# Supplementary material for: CSTF3 contributes to platinum resistance in ovarian cancer through alternative polyadenylation of lncRNA NEAT1 and generating the short isoform NEAT1_1
Source: PubMed Central journal article supplement (PMC11187223; doi:10.1038/s41419-024-06816-1), 2024-06-19

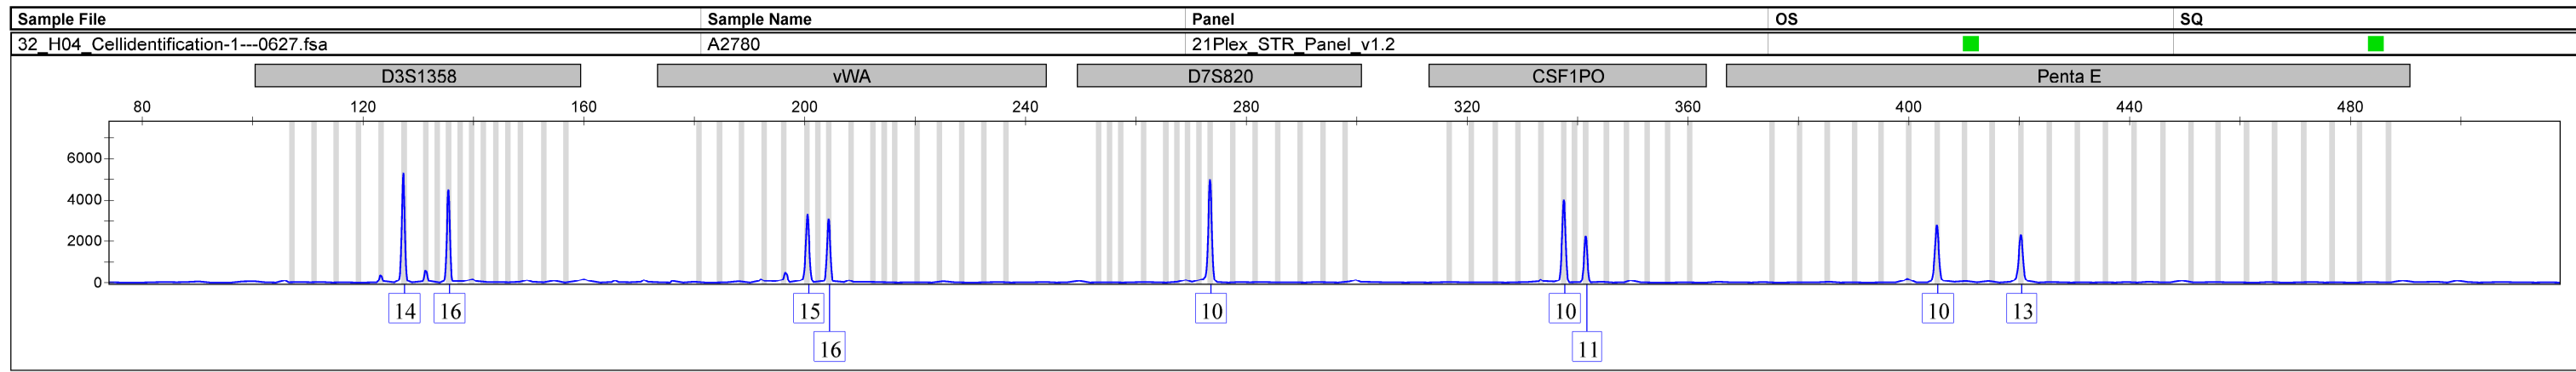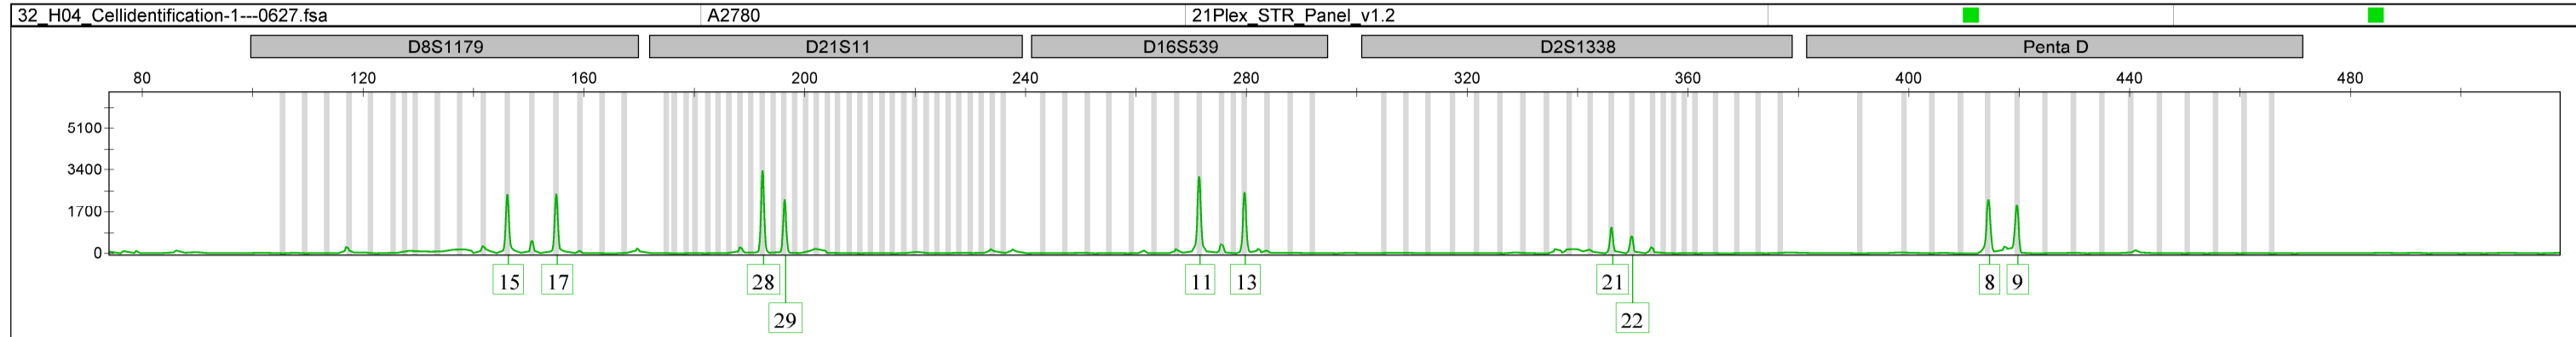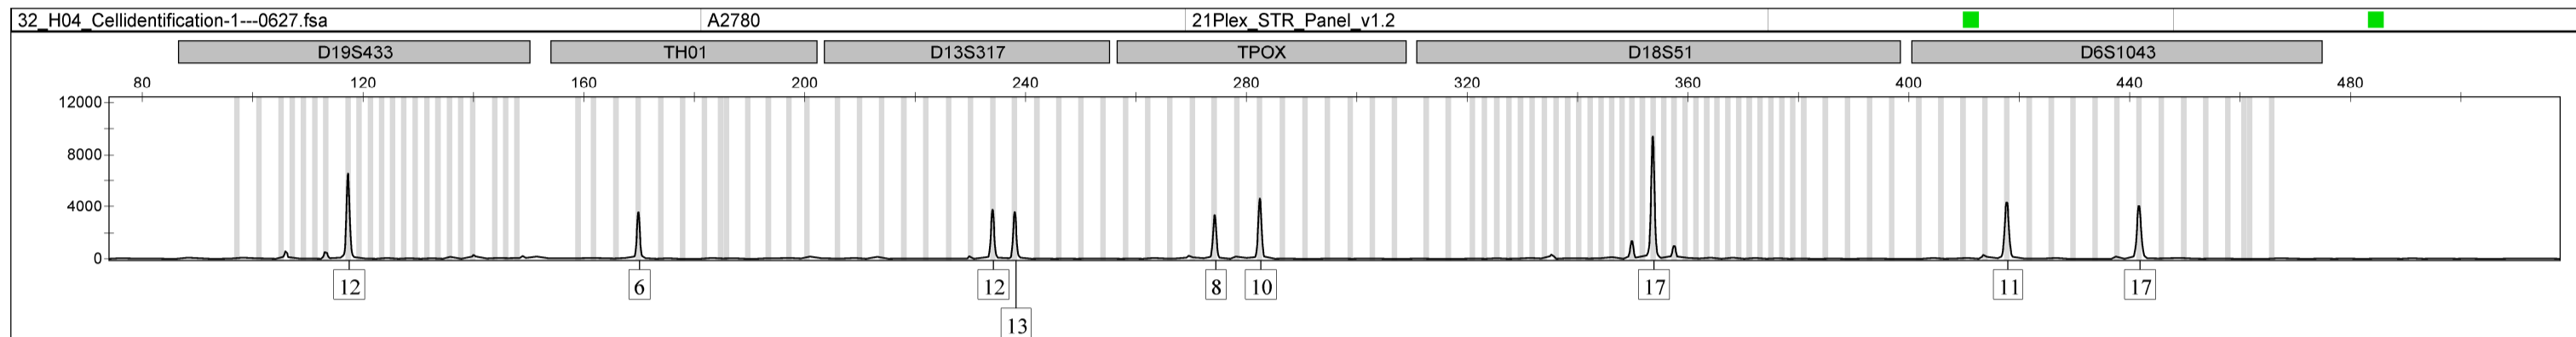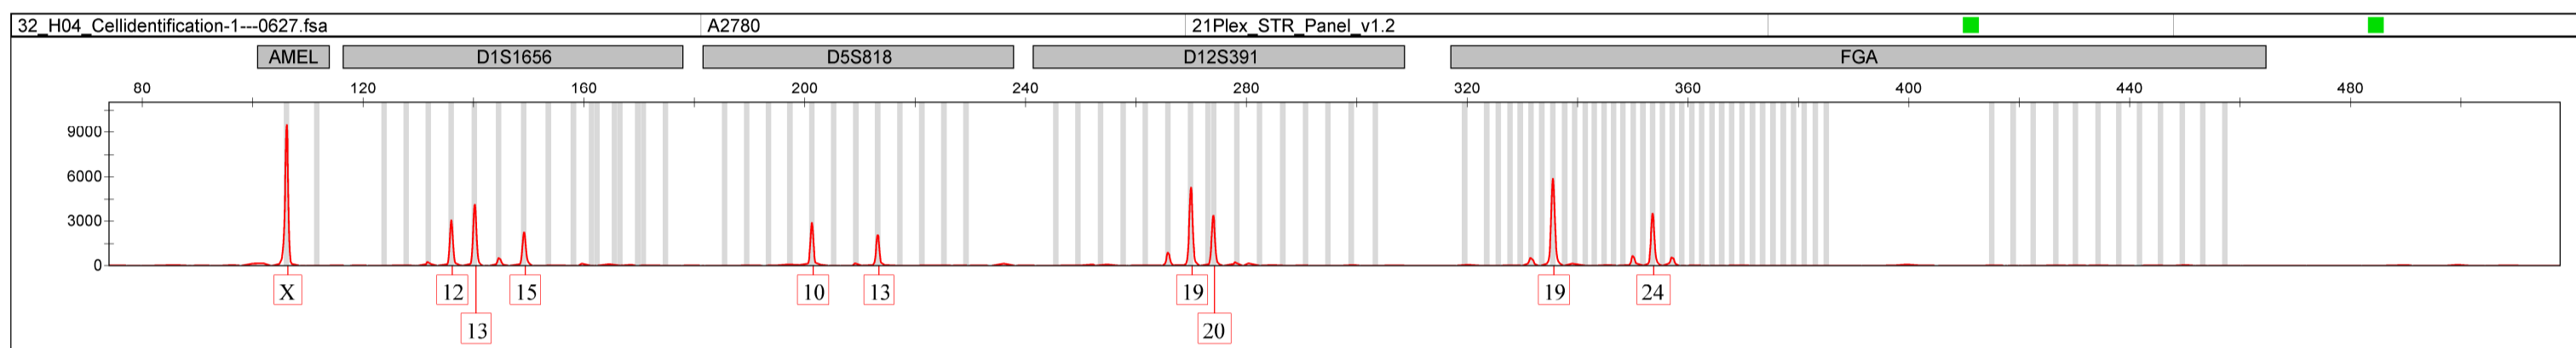

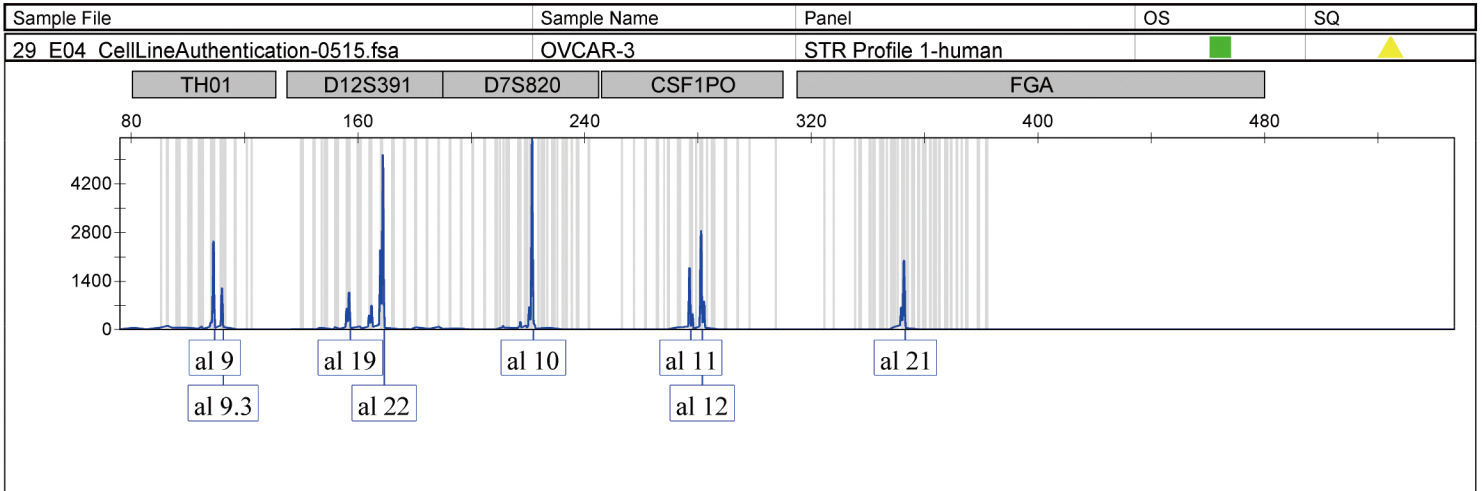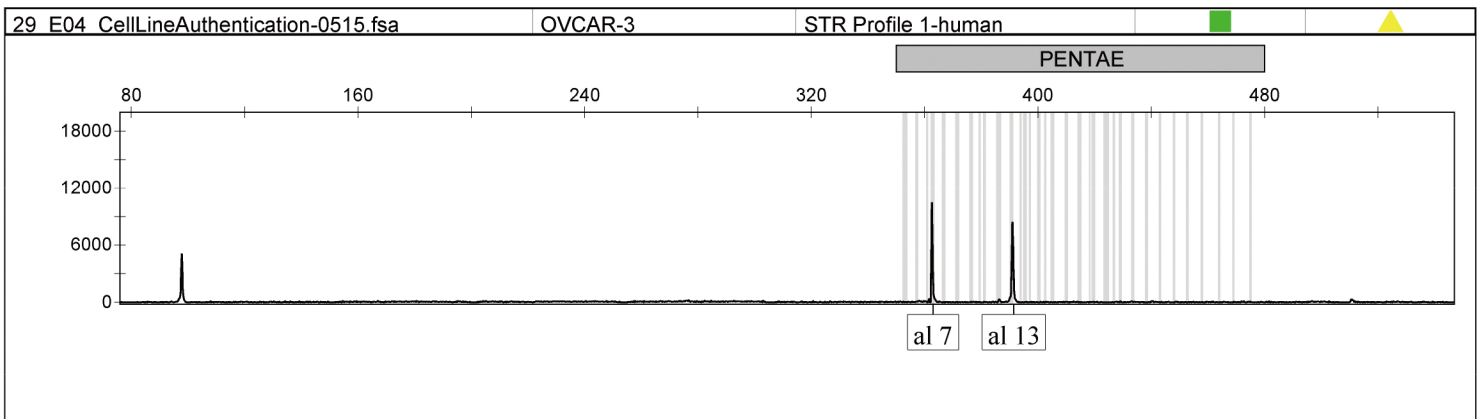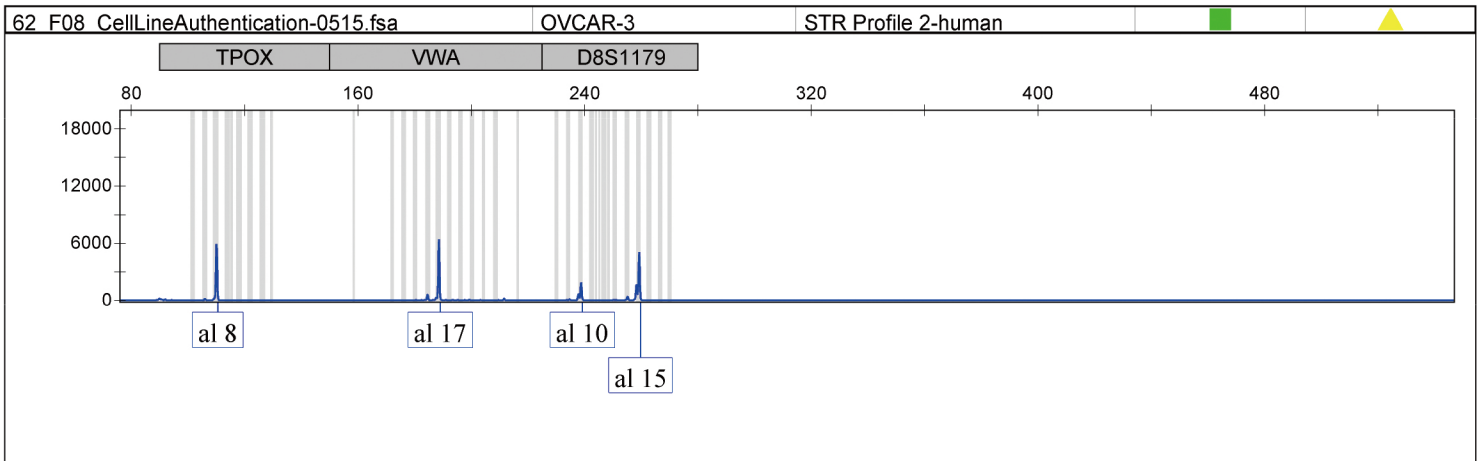

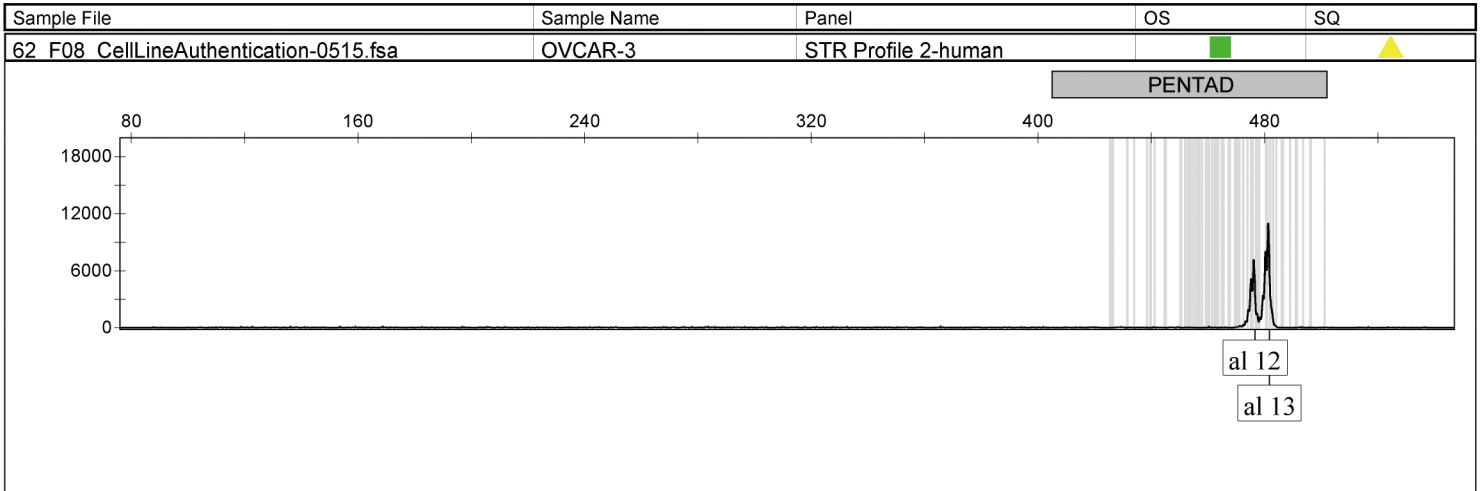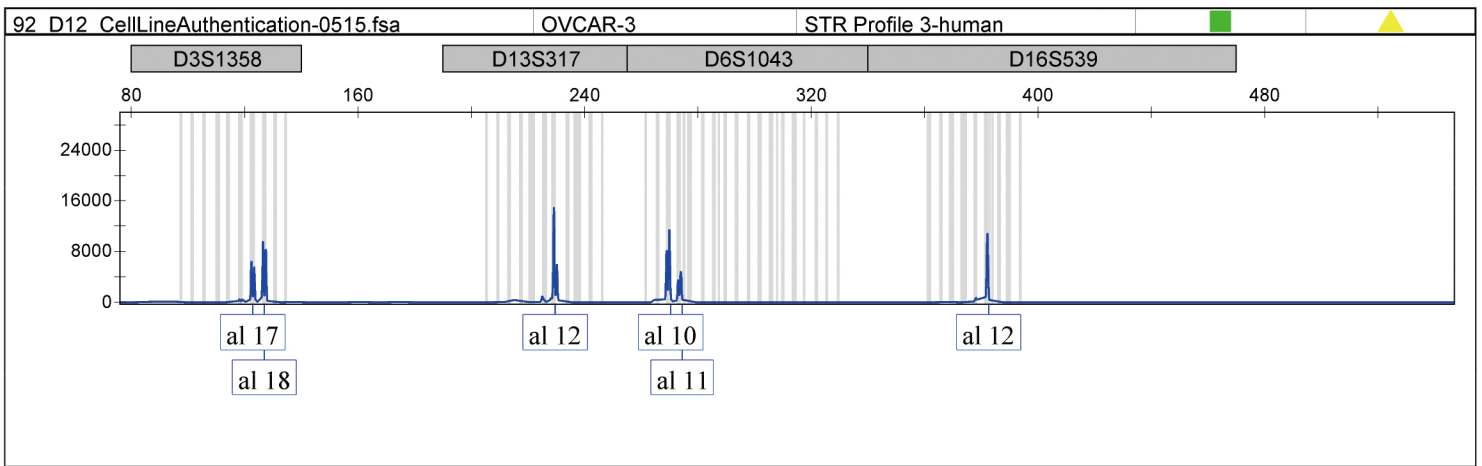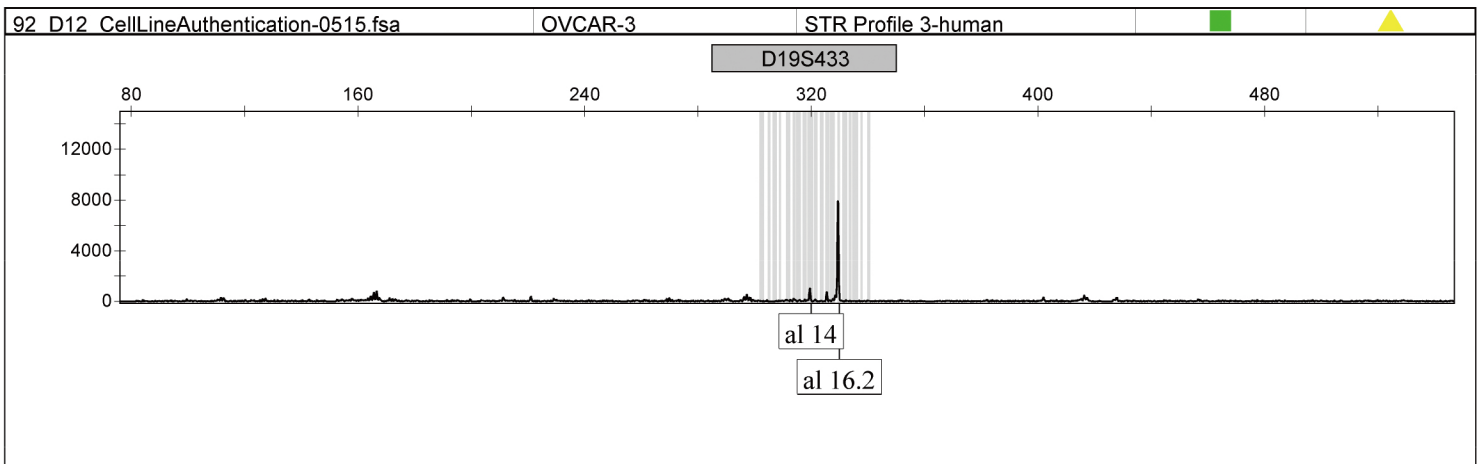

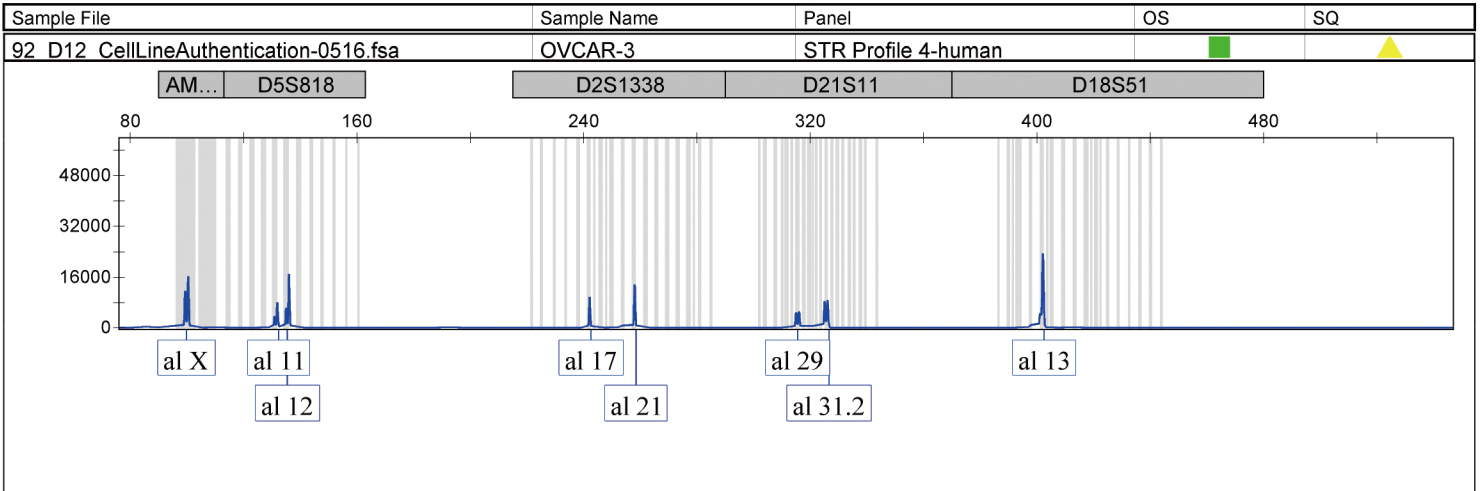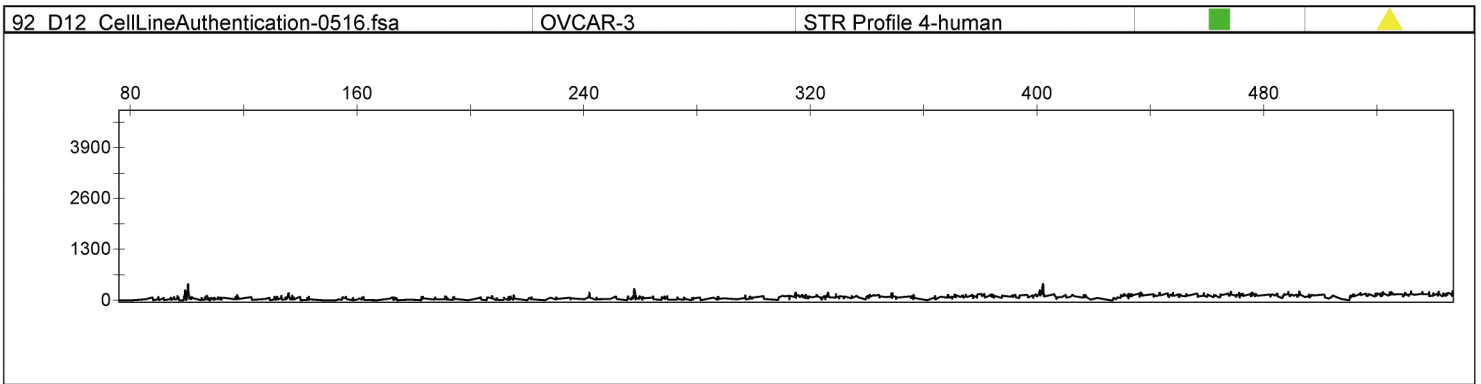

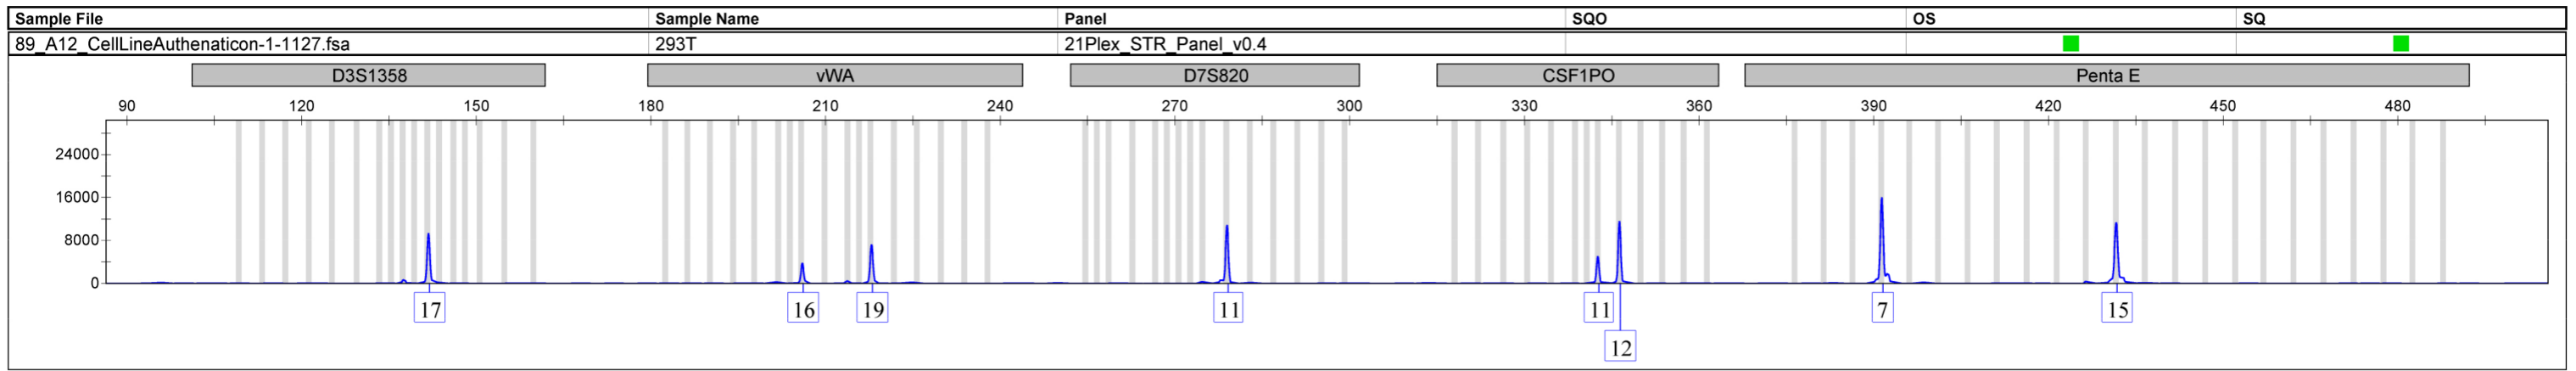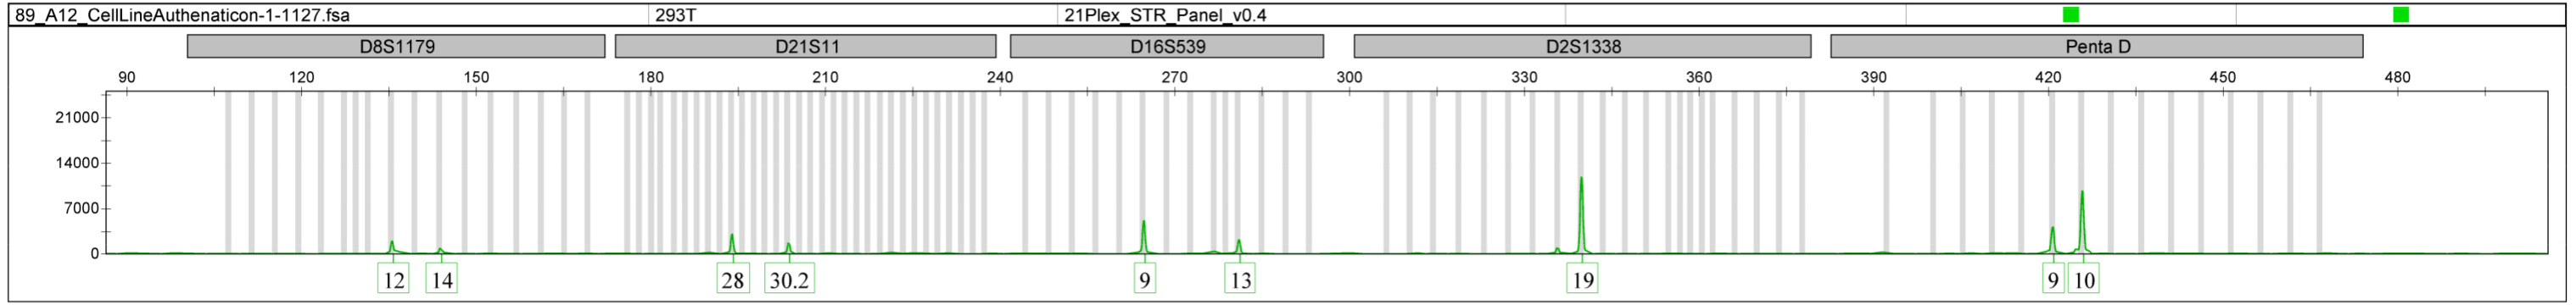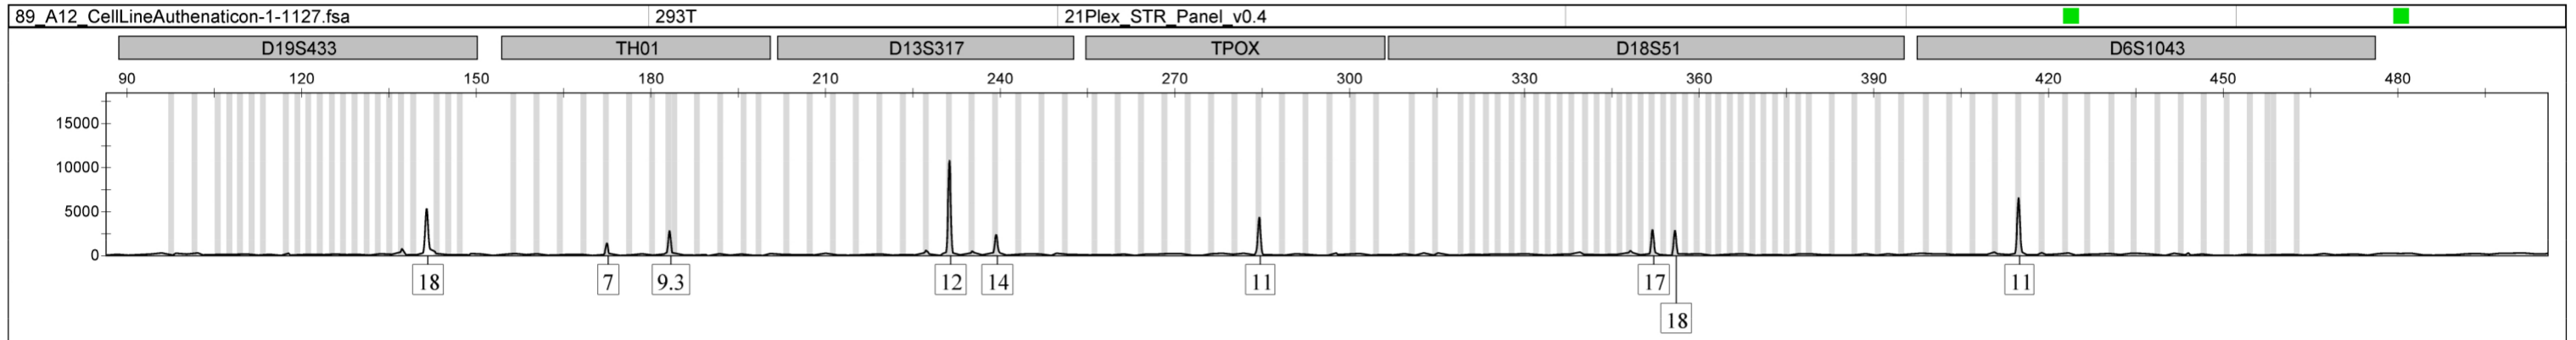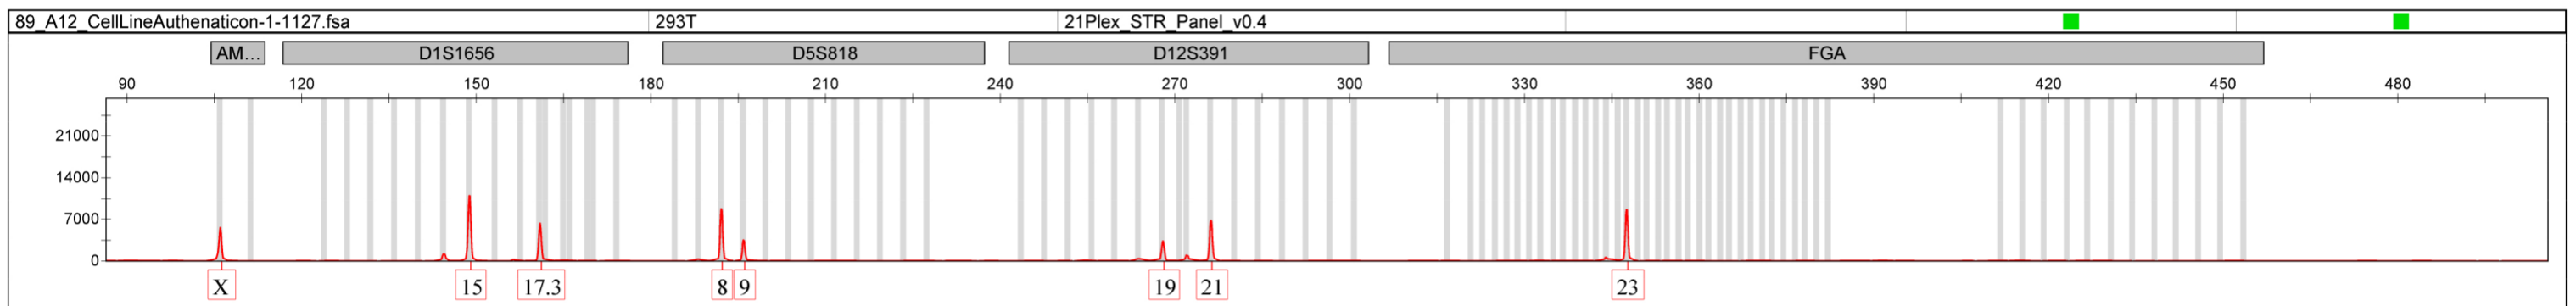

Supplement: 41419_2024_6816_MOESM3_ESM.pdf [file 41419_2024_6816_MOESM3_ESM.pdf]
